# Supplementary material for: A Simple Biosensor Based on Streptavidin-HRP for the Detection of Bacteria Exploiting HRPs Molecular Surface Properties
Source: MDPI journal article supplement (doi:10.3390/applbiosci2030032), 2023-09-19
Supplement: s1 [file s1]

Archive with 1 entries (1 files):
- applbiosci-2525319-supplementary.pdf
